# Supplementary material for: Progenitor-Derivative Relationships of Hordeum Polyploids (Poaceae, Triticeae) Inferred from Sequences of TOPO6, a Nuclear Low-Copy Gene Region
Source: PubMed Central journal article supplement (PMC3316500; doi:10.1371/journal.pone.0033808), 2012-03-30
Supplement: pone.0033808.s003.pdf [file pone.0033808.s003.pdf]

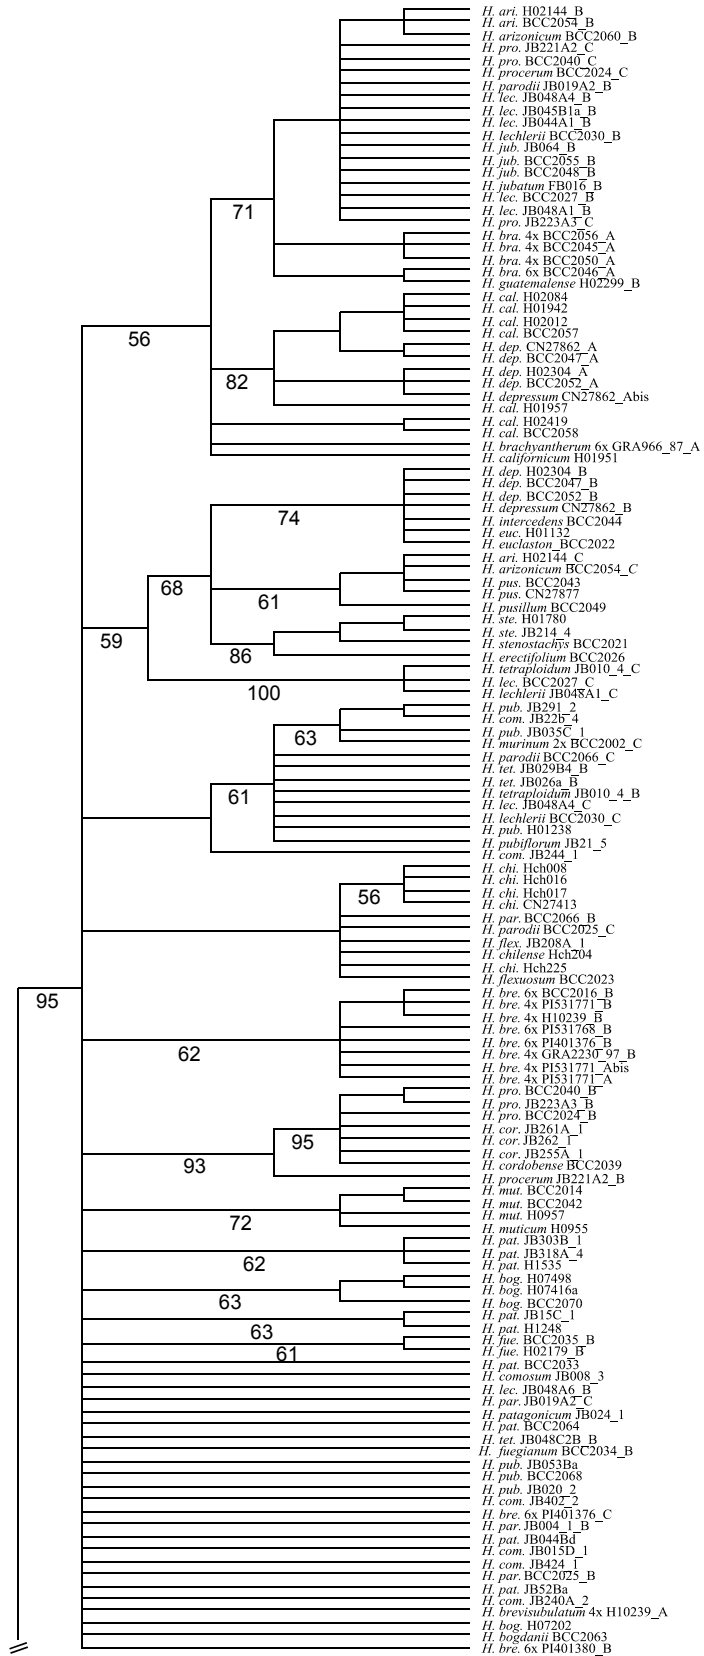

Figure S3. (Continued)
