# Supplementary material for: Progenitor-Derivative Relationships of Hordeum Polyploids (Poaceae, Triticeae) Inferred from Sequences of TOPO6, a Nuclear Low-Copy Gene Region
Source: PubMed Central journal article supplement (PMC3316500; doi:10.1371/journal.pone.0033808), 2012-03-30
Supplement: pone.0033808.s004.pdf [file pone.0033808.s004.pdf]

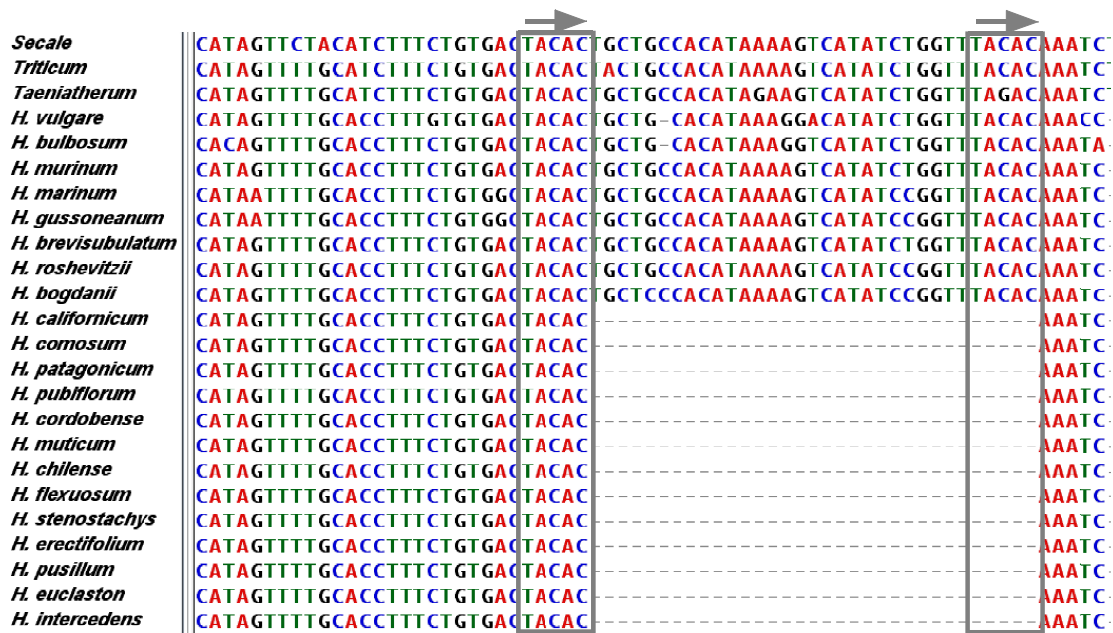

**Figure S4.** Part of the *TOPO6* alignment showing a 33 bp deletion (alignment positions 925-957) characteristic for sequences derived from diploid New World *Hordeum* species. Sequence deletion occurred at a five basepair direct repeat (TACAC) flanking the deleted region (arrows). The absence of the deletion in *H. bogdanii* together with its presence in all American diploid species indicates that not *H. bogdanii* itself but a close relative of this species was the initial starting point for the colonization of the Americas by Asian *Hordeum*.
