# Supplementary material for: Progenitor-Derivative Relationships of Hordeum Polyploids (Poaceae, Triticeae) Inferred from Sequences of TOPO6, a Nuclear Low-Copy Gene Region
Source: PubMed Central journal article supplement (PMC3316500; doi:10.1371/journal.pone.0033808), 2012-03-30
Supplement: pone.0033808.s005.pdf [file pone.0033808.s005.pdf]

**Table S1 Individuals included in the study**

| Species                                       | Ploidy   | Accession number          | Country                        | Species distribution       | Material source                                | Topo6 type                                  |
|-----------------------------------------------|----------|---------------------------|--------------------------------|----------------------------|------------------------------------------------|---------------------------------------------|
| <i>Hordeum arizonicum</i><br>Covas            | 6x       | BCC2054 (H02313)          | USA                            | North America              | Barley Core Collection                         | <i>H. arizonicum</i> BCC2054_A, B, C        |
|                                               |          | BCC2060 (H03253)          | USA                            | North America              | Barley Core Collection                         | <i>H. arizonicum</i> BCC2060_A, B           |
|                                               |          | H02144 (NGB90553)         | Mexico                         | North America              | Nordic Genetic Resource Centre                 | <i>H. arizonicum</i> H02144_A, B, C         |
| <i>Hordeum bogdanii</i><br>Wilensky           | 2x       | BCC2070 (H07804)          | China                          | Central Asia               | Barley Core Collection                         | <i>H. bogdanii</i> BCC2070                  |
|                                               |          | H07065 (NGB06797)         | China                          | Central Asia               | Nordic Genetic Resource Centre                 |                                             |
|                                               |          | H07421b (NGB07634)        | China                          | Central Asia               | Nordic Genetic Resource Centre                 |                                             |
|                                               |          | H07429 (NGB06893)         | China                          | Central Asia               | Nordic Genetic Resource Centre                 |                                             |
|                                               |          | H07436 (NGB90003)         | China                          | Central Asia               | Nordic Genetic Resource Centre                 |                                             |
|                                               |          | H07461 (NGB07281)         | China                          | Central Asia               | Nordic Genetic Resource Centre                 |                                             |
|                                               |          | H07465 (NGB90048)         | China                          | Central Asia               | Nordic Genetic Resource Centre                 |                                             |
|                                               |          | H07476 (NGB08522)         | China                          | Central Asia               | Nordic Genetic Resource Centre                 |                                             |
|                                               |          | H07485b (NGB07282)        | China                          | Central Asia               | Nordic Genetic Resource Centre                 |                                             |
|                                               |          | H07569 (NGB08525)         | China                          | Central Asia               | Nordic Genetic Resource Centre                 |                                             |
|                                               |          | H07752 (NGB90004)         | China                          | Central Asia               | Nordic Genetic Resource Centre                 |                                             |
|                                               |          | H07831 (NGB90006)         | China                          | Central Asia               | Nordic Genetic Resource Centre                 |                                             |
|                                               |          | H07859 (NGB90007)         | China                          | Central Asia               | Nordic Genetic Resource Centre                 |                                             |
|                                               |          | H08704 (NGB90232)         | China                          | Central Asia               | Nordic Genetic Resource Centre                 |                                             |
|                                               |          | H08774 (NGB90049)         | China                          | Central Asia               | Nordic Genetic Resource Centre                 |                                             |
|                                               |          | H09215 (NGB90548)         | China                          | Central Asia               | Nordic Genetic Resource Centre                 |                                             |
|                                               |          | H03084 (NGB90002)         | China                          | Central Asia               | Nordic Genetic Resource Centre                 |                                             |
|                                               |          | PI499499                  | China                          | Central Asia               | GRIN USDA Aberdeen, USA                        |                                             |
|                                               |          | PI499500                  | China                          | Central Asia               | GRIN USDA Aberdeen, USA                        |                                             |
|                                               |          | PI531760                  | China                          | Central Asia               | GRIN USDA Aberdeen, USA                        |                                             |
|                                               |          | BCC2063 (H04014)          | Pakistan                       | Central Asia               | Barley Core Collection                         | <i>H. bogdanii</i> BCC2063                  |
|                                               |          | GRA0969                   | Pakistan                       | Central Asia               | Gene bank IPK                                  |                                             |
|                                               |          | H00240 (NGB08519)         | Afghanistan                    | Central Asia               | Nordic Genetic Resource Centre                 |                                             |
|                                               |          | H00295 (NGB06440)         | Pakistan                       | Central Asia               | Nordic Genetic Resource Centre                 |                                             |
|                                               |          | H07067 (NGB06798)         | China                          | Central Asia               | Nordic Genetic Resource Centre                 |                                             |
|                                               |          | H07411 (NGB90229)         | China                          | Central Asia               | Nordic Genetic Resource Centre                 |                                             |
|                                               |          | H08769 (NGB90337)         | China                          | Central Asia               | Nordic Genetic Resource Centre                 |                                             |
|                                               |          | H09213 (NGB90547)         | China                          | Central Asia               | Nordic Genetic Resource Centre                 |                                             |
|                                               |          | PI499501                  | China                          | Central Asia               | GRIN USDA Aberdeen, USA                        |                                             |
|                                               |          | PI499646                  | China                          | Central Asia               | GRIN USDA Aberdeen, USA                        |                                             |
|                                               |          | H08700 (NGB90231)         | China                          | Central Asia               | Nordic Genetic Resource Centre                 |                                             |
|                                               |          | H00287 (NGB6439)          | Pakistan                       | Central Asia               | Nordic Genetic Resource Centre                 |                                             |
|                                               |          | H07498 (NGB08523)         | China                          | Central Asia               | Nordic Genetic Resource Centre                 | <i>H. bogdanii</i> H07498                   |
| H07521 (NGB90047)                             | China    | Central Asia              | Nordic Genetic Resource Centre |                            |                                                |                                             |
| H07557 (NGB08524)                             | China    | Central Asia              | Nordic Genetic Resource Centre |                            |                                                |                                             |
| H07585 (NGB07283)                             | China    | Central Asia              | Nordic Genetic Resource Centre |                            |                                                |                                             |
| H07727 (NGB90230)                             | China    | Central Asia              | Nordic Genetic Resource Centre |                            |                                                |                                             |
| PI499498                                      | China    | Central Asia              | GRIN USDA Aberdeen, USA        |                            |                                                |                                             |
| PI531761                                      | China    | Central Asia              | GRIN USDA Aberdeen, USA        |                            |                                                |                                             |
| H07202 (NGB90385)                             | China    | Central Asia              | Nordic Genetic Resource Centre | <i>H. bogdanii</i> H07202  |                                                |                                             |
| H07416a (NGB08586)                            | China    | Central Asia              | Nordic Genetic Resource Centre | <i>H. bogdanii</i> H07416a |                                                |                                             |
| <i>Hordeum brachyantherum</i><br>Nevski       | 4x       | BCC2045 (H01958)          | USA                            | North America              | Barley Core Collection                         | <i>H. brachyantherum</i> 4x BCC2045_A, B    |
|                                               |          | BCC2050 (H02138)          | USA                            | North America              | Barley Core Collection                         | <i>H. brachyantherum</i> 4x BCC2050_A, B    |
|                                               |          | BCC2056 (H02360)          | Canada                         | North America              | Barley Core Collection                         | <i>H. brachyantherum</i> 4x BCC2056_A, B    |
|                                               | 6x       | BCC2046 (H02001, GRA0968) | USA                            | North America              | Barley Core Collection                         | <i>H. brachyantherum</i> 6x BCC2046_A, B, C |
| GRA0966/87                                    |          | USA                       | North America                  | Gene bank IPK              | <i>H. brachyantherum</i> 6x GRA0966_87_A, B, C |                                             |
| <i>Hordeum brevisubulatum</i> (Trin.)<br>Link | 2x       | PI229753                  | Iran                           | Central Asia               | GRIN USDA Aberdeen, USA                        | <i>H. brevisubulatum</i> 2x PI229753_A, B   |
|                                               |          | PI401374                  | Iran                           | Central Asia               | GRIN USDA Aberdeen, USA                        | <i>H. brevisubulatum</i> 2x PI401374_A, B   |
|                                               |          | PI401390                  | Iran                           | Central Asia               | GRIN USDA Aberdeen, USA                        | <i>H. brevisubulatum</i> 2x PI401390        |
|                                               |          | H00315                    | Iran                           | Central Asia               | Nordic Genetic Resource Centre                 | <i>H. brevisubulatum</i> 2x H00315          |
|                                               | PI440419 | Russia                    | Central Asia                   | GRIN USDA Aberdeen, USA    | <i>H. brevisubulatum</i> 2x PI440419           |                                             |
|                                               | 4x       | H10239 (NGB90440)         | Tajikistan                     | Central Asia               | Nordic Genetic Resource Centre                 | <i>H. brevisubulatum</i> 4x H10239_A, B     |
|                                               |          | BG156/07                  | Russia                         | Central Asia               | Barley Core Collection                         | <i>H. brevisubulatum</i> 4x BG156_07_A, B   |

| Species                                      | Ploidy | Accession number  | Country      | Species distribution         | Material source                | Topo6 type                                      |
|----------------------------------------------|--------|-------------------|--------------|------------------------------|--------------------------------|-------------------------------------------------|
|                                              |        | PI401387          | Iran         | Central Asia                 | GRIN USDA Aberdeen, USA        | <i>H. brevisubulatum</i> 4x PI401387            |
|                                              |        | PI401388          | Iran         | Central Asia                 | GRIN USDA Aberdeen, USA        | <i>H. brevisubulatum</i> 4x PI401388_A, Abis    |
|                                              |        | PI229449          | Iran         | Central Asia                 | GRIN USDA Aberdeen, USA        | <i>H. brevisubulatum</i> 4x PI229449            |
|                                              |        | PI531771          | Kyrgyzstan   | Central Asia                 | GRIN USDA Aberdeen, USA        | <i>H. brevisubulatum</i> 4x PI531771_A, Abis, B |
|                                              | 6x     | BCC2016 (H10210)  | Tajikistan   | Central Asia                 | Barley Core Collection         | <i>H. brevisubulatum</i> 6x BCC2016_A, B        |
|                                              |        | PI401376          | Iran         | Central Asia                 | GRIN USDA Aberdeen, USA        | <i>H. brevisubulatum</i> 6x PI401376_A, B, C    |
|                                              |        | PI401380          | Iran         | Central Asia                 | GRIN USDA Aberdeen, USA        | <i>H. brevisubulatum</i> 6x PI401380_A, Abis, B |
|                                              |        | PI531768          | Tajikistan   | Central Asia                 | GRIN USDA Aberdeen, USA        | <i>H. brevisubulatum</i> 6x PI531768_A, B       |
|                                              | 4x     | GRA2230/97        | Russia       | Central Asia                 | Gene bank IPK                  | <i>H. brevisubulatum</i> 4x GRA2230_97_A, B     |
|                                              |        | GRA0894/97        | Russia       | Central Asia                 | Gene bank IPK                  | <i>H. brevisubulatum</i> 4x GRA0894_97_A, B, C  |
|                                              |        | H00312 (NGB90046) | Iran         | Central Asia                 | Nordic Genetic Resource Centre | <i>H. brevisubulatum</i> 4x H00312_A, B         |
| <i>Hordeum bulbosum</i> L.                   | 2x     | BCC2061 (H03878)  | Italy        | Europe/SW Asia/Mediterranean | Barley Core Collection         | <i>H. bulbosum</i> 2x BCC2061_A, B              |
|                                              |        | JB138_1           | Italy        | Europe/SW Asia/Mediterranean | Sabine Jakob, Frank Blattner   | <i>H. bulbosum</i> 2x JB138_1_A, B              |
|                                              |        | JB145_2           | Italy        | Europe/SW Asia/Mediterranean | Sabine Jakob, Frank Blattner   | <i>H. bulbosum</i> 2x JB145_2_A, B              |
|                                              |        | JB149_1           | Italy        | Europe/SW Asia/Mediterranean | Sabine Jakob, Frank Blattner   | <i>H. bulbosum</i> 2x JB149_1_A, B              |
|                                              |        | F2142             | Uzbekistan   | Europe/SW Asia/Mediterranean | Reinhard Fritsch               | <i>H. bulbosum</i> 2x F2142                     |
|                                              | 4x     | F2210             | Iran         | Europe/SW Asia/Mediterranean | Reinhard Fritsch               | <i>H. bulbosum</i> 4x F2210_A, B                |
|                                              |        | F2227             | Iran         | Europe/SW Asia/Mediterranean | Reinhard Fritsch               | <i>H. bulbosum</i> 4x F2227_A, B                |
|                                              |        | BCC2018 (H10298)  | Tajikistan   | Europe/SW Asia/Mediterranean | Barley Core Collection         | <i>H. bulbosum</i> 4x BCC2018_A, B              |
| <i>Hordeum californicum</i> Covas & Stebbins | 2x     | H02419 (NGB90225) | USA          | North America                | Nordic Genetic Resource Centre | <i>H. californicum</i> H02419                   |
|                                              |        | H02428 (NGB90227) | USA          | North America                | Nordic Genetic Resource Centre |                                                 |
|                                              |        | H02445 (NGB90228) | USA          | North America                | Nordic Genetic Resource Centre |                                                 |
|                                              |        | H02084 (NGB90009) | USA          | North America                | Nordic Genetic Resource Centre | <i>H. californicum</i> H02084                   |
|                                              |        | H02408 (NGB90223) | USA          | North America                | Nordic Genetic Resource Centre |                                                 |
|                                              |        | H01942 (NGB06800) | USA          | North America                | Nordic Genetic Resource Centre | <i>H. californicum</i> H01942                   |
|                                              |        | H02423 (NGB90226) | USA          | North America                | Nordic Genetic Resource Centre |                                                 |
|                                              |        | H02012 (NGB06462) | USA          | North America                | Nordic Genetic Resource Centre | <i>H. californicum</i> H02012                   |
|                                              |        | H02414 (NGB90224) | USA          | North America                | Nordic Genetic Resource Centre |                                                 |
|                                              |        | H01957 (NGB06802) | USA          | North America                | Nordic Genetic Resource Centre | <i>H. californicum</i> H01957                   |
|                                              |        | BCC2057 (H02401)  | USA          | North America                | Barley Core Collection         | <i>H. californicum</i> BCC2057                  |
|                                              |        | BCC2058 (H02428)  | USA          | North America                | Barley Core Collection         | <i>H. californicum</i> BCC2058                  |
|                                              |        | H01951 (NGB06801) | USA          | North America                | Nordic Genetic Resource Centre | <i>H. californicum</i> H01951                   |
| <i>Hordeum capense</i> Thunb.                | 4x     | BCC2062 (H03923)  | South Africa | South Africa                 | Barley Core Collection         | <i>H. capense</i> BCC2062_A, B                  |
|                                              |        | H00335 (NGB90596) | Lesotho      | South Africa                 | Nordic Genetic Resource Centre | <i>H. capense</i> H00335_A, B                   |
| <i>Hordeum chilense</i> Roemer & Schultes    | 2x     | Hch204            | Chile        | South America                | Pilar Hernandez                | <i>H. chilense</i> Hch204                       |
|                                              |        | Hch207            | Chile        | South America                | Pilar Hernandez                |                                                 |
|                                              |        | Hch210            | Chile        | South America                | Pilar Hernandez                |                                                 |
|                                              |        | Hch212            | Chile        | South America                | Pilar Hernandez                |                                                 |
|                                              |        | Hch290            | Chile        | South America                | Pilar Hernandez                |                                                 |
|                                              |        | Hch298            | Chile        | South America                | Pilar Hernandez                |                                                 |
|                                              |        | Hch308            | Chile        | South America                | Pilar Hernandez                |                                                 |
|                                              |        | JB006A_2          | Argentina    | South America                | Sabine Jakob, Frank Blattner   |                                                 |
|                                              |        | JB006A_4          | Argentina    | South America                | Sabine Jakob, Frank Blattner   |                                                 |
|                                              |        | JB006C_12         | Argentina    | South America                | Sabine Jakob, Frank Blattner   |                                                 |
|                                              |        | JB006C_13         | Argentina    | South America                | Sabine Jakob, Frank Blattner   |                                                 |
|                                              |        | Hch017            | Chile        | South America                | Pilar Hernandez                | <i>H. chilense</i> Hch017                       |
|                                              |        | Hch068            | Chile        | South America                | Pilar Hernandez                |                                                 |
|                                              |        | Hch245            | Chile        | South America                | Pilar Hernandez                |                                                 |
|                                              |        | Hch250            | Chile        | South America                | Pilar Hernandez                |                                                 |
|                                              |        | Hch261            | Chile        | South America                | Pilar Hernandez                |                                                 |
|                                              |        | Hch300            | Chile        | South America                | Pilar Hernandez                |                                                 |
|                                              |        | CN27413           | Argentina    | South America                | AGR, Saskatoon, Canada         | <i>H. chilense</i> CN27413                      |
|                                              |        | Hch251            | Chile        | South America                | Pilar Hernandez                |                                                 |
|                                              |        | Hch016            | Chile        | South America                | Pilar Hernandez                | <i>H. chilense</i> Hch016                       |
|                                              |        | Hch225            | Chile        | South America                | Pilar Hernandez                | <i>H. chilense</i> Hch225                       |
|                                              |        | Hch008            | Chile        | South America                | Pilar Hernandez                | <i>H. chilense</i> Hch008                       |
| <i>Hordeum comosum</i> Presl                 | 2x     | JB008_3           | Argentina    | South America                | Sabine Jakob, Frank Blattner   | <i>H. comosum</i> JB008_3                       |
|                                              |        | JB307_1           | Argentina    | South America                | Sabine Jakob, Frank Blattner   |                                                 |
|                                              |        | JB316A_1          | Argentina    | South America                | Sabine Jakob, Frank Blattner   |                                                 |
|                                              |        | JB316A_3          | Argentina    | South America                | Sabine Jakob, Frank Blattner   |                                                 |

| Species                                                         | Ploidy | Accession number              | Country   | Species distribution | Material source                | Topo6 type                             |
|-----------------------------------------------------------------|--------|-------------------------------|-----------|----------------------|--------------------------------|----------------------------------------|
|                                                                 |        | JB412_1                       | Argentina | South America        | Sabine Jakob, Frank Blattner   |                                        |
|                                                                 |        | JB413_1                       | Argentina | South America        | Sabine Jakob, Frank Blattner   |                                        |
|                                                                 |        | JB415_2                       | Argentina | South America        | Sabine Jakob, Frank Blattner   |                                        |
|                                                                 |        | JB418_1                       | Argentina | South America        | Sabine Jakob, Frank Blattner   |                                        |
|                                                                 |        | JB421B_4                      | Argentina | South America        | Sabine Jakob, Frank Blattner   |                                        |
|                                                                 |        | JB468_1                       | Argentina | South America        | Sabine Jakob, Frank Blattner   |                                        |
|                                                                 |        | JB015D_1                      | Argentina | South America        | Sabine Jakob, Frank Blattner   | <i>H. comosum</i> JB015D_1             |
|                                                                 |        | JB053C_3                      | Argentina | South America        | Sabine Jakob, Frank Blattner   |                                        |
|                                                                 |        | JB236A_2                      | Argentina | South America        | Sabine Jakob, Frank Blattner   |                                        |
|                                                                 |        | JB281A_1                      | Argentina | South America        | Sabine Jakob, Frank Blattner   |                                        |
|                                                                 |        | JB410_1                       | Argentina | South America        | Sabine Jakob, Frank Blattner   |                                        |
|                                                                 |        | JB447B_2                      | Argentina | South America        | Sabine Jakob, Frank Blattner   |                                        |
|                                                                 |        | JB448_3                       | Argentina | South America        | Sabine Jakob, Frank Blattner   |                                        |
|                                                                 |        | JB467_3                       | Argentina | South America        | Sabine Jakob, Frank Blattner   |                                        |
|                                                                 |        | JB402_2                       | Argentina | South America        | Sabine Jakob, Frank Blattner   | <i>H. comosum</i> JB402_2              |
|                                                                 |        | JB402_5                       | Argentina | South America        | Sabine Jakob, Frank Blattner   |                                        |
|                                                                 |        | JB022B_4                      | Argentina | South America        | Sabine Jakob, Frank Blattner   | <i>H. comosum</i> JB022B_4             |
|                                                                 |        | JB240A_2                      | Argentina | South America        | Sabine Jakob, Frank Blattner   | <i>H. comosum</i> JB240A_2             |
|                                                                 |        | JB244_1                       | Argentina | South America        | Sabine Jakob, Frank Blattner   | <i>H. comosum</i> JB244_1              |
|                                                                 |        | JB424_1                       | Argentina | South America        | Sabine Jakob, Frank Blattner   | <i>H. comosum</i> JB424_1              |
| <i>Hordeum cordobense</i><br>Bothmer, Jacobsen &<br>Nicora      | 2x     | BCC2039 (H01702,<br>GRA0974)  | Argentina | South America        | Barley Core Collection         | <i>H. cordobense</i> BCC2039           |
|                                                                 |        | BCC2067 (H06429)              | Argentina | South America        | Barley Core Collection         |                                        |
|                                                                 |        | JB247A_1                      | Argentina | South America        | Sabine Jakob, Frank Blattner   |                                        |
|                                                                 |        | JB247A_3                      | Argentina | South America        | Sabine Jakob, Frank Blattner   |                                        |
|                                                                 |        | JB249_1                       | Argentina | South America        | Sabine Jakob, Frank Blattner   |                                        |
|                                                                 |        | JB249_2                       | Argentina | South America        | Sabine Jakob, Frank Blattner   |                                        |
|                                                                 |        | JB249_3                       | Argentina | South America        | Sabine Jakob, Frank Blattner   |                                        |
|                                                                 |        | JB253A_1                      | Argentina | South America        | Sabine Jakob, Frank Blattner   |                                        |
|                                                                 |        | JB253A_2                      | Argentina | South America        | Sabine Jakob, Frank Blattner   |                                        |
|                                                                 |        | JB253A_3                      | Argentina | South America        | Sabine Jakob, Frank Blattner   |                                        |
|                                                                 |        | JB262_3                       | Argentina | South America        | Sabine Jakob, Frank Blattner   |                                        |
|                                                                 |        | JB263_1                       | Argentina | South America        | Sabine Jakob, Frank Blattner   |                                        |
|                                                                 |        | JB263_2                       | Argentina | South America        | Sabine Jakob, Frank Blattner   |                                        |
|                                                                 |        | JB265_1                       | Argentina | South America        | Sabine Jakob, Frank Blattner   |                                        |
|                                                                 |        | JB255A_1                      | Argentina | South America        | Sabine Jakob, Frank Blattner   | <i>H. cordobense</i> JB255A_1          |
|                                                                 |        | JB255A_2                      | Argentina | South America        | Sabine Jakob, Frank Blattner   |                                        |
|                                                                 |        | JB255A_3                      | Argentina | South America        | Sabine Jakob, Frank Blattner   |                                        |
|                                                                 |        | JB257A_1                      | Argentina | South America        | Sabine Jakob, Frank Blattner   |                                        |
|                                                                 |        | JB261A_1                      | Argentina | South America        | Sabine Jakob, Frank Blattner   | <i>H. cordobense</i> JB261A_1          |
|                                                                 |        | JB263_3                       | Argentina | South America        | Sabine Jakob, Frank Blattner   |                                        |
|                                                                 |        | JB262_1                       | Argentina | South America        | Sabine Jakob, Frank Blattner   | <i>H. cordobense</i> JB262_1           |
|                                                                 |        | JB262_2                       | Argentina | South America        | Sabine Jakob, Frank Blattner   |                                        |
| <i>Hordeum depressum</i><br>(Scribn. & J. G. Sm.)<br>Rydb.      | 4x     | BCC2047 (H02006)              | USA       | North America        | Barley Core Collection         | <i>H. depressum</i> BCC2047_A, B       |
|                                                                 |        | BCC2052 (H02306)              | USA       | North America        | Barley Core Collection         | <i>H. depressum</i> BCC2052_A, B       |
|                                                                 |        | CN27862                       | USA       | North America        | AGR, Saskatoon, Canada         | <i>H. depressum</i> CN27862_A, Abis, B |
|                                                                 |        | H02304 (NGB06810)             | USA       | North America        | Nordic Genetic Resource Centre | <i>H. depressum</i> H02304_A, B        |
| <i>Hordeum erectifolium</i><br>Bothmer, Jacobsen &<br>Jørgensen | 2x     | BCC2026 (H01150)              | Argentina | South America        | Barley Core Collection         | <i>H. erectifolium</i> BCC2026         |
| <i>Hordeum euclaston</i><br>Steud.                              | 2x     | BCC2022 (H01115)              | Argentina | South America        | Barley Core Collection         | <i>H. euclaston</i> BCC2022            |
|                                                                 |        | BCC2029 (H01263)              | Argentina | South America        | Barley Core Collection         |                                        |
|                                                                 |        | CN27340                       | Argentina | South America        | AGR, Saskatoon, Canada         |                                        |
|                                                                 |        | CN27343                       | Argentina | South America        | AGR, Saskatoon, Canada         |                                        |
|                                                                 |        | CN27359                       | Argentina | South America        | AGR, Saskatoon, Canada         |                                        |
|                                                                 |        | CN27369                       | Argentina | South America        | AGR, Saskatoon, Canada         |                                        |
|                                                                 |        | H01103 (NGB08534)             | Argentina | South America        | Nordic Genetic Resource Centre |                                        |
|                                                                 |        | H01107 (NGB06465)             | Argentina | South America        | Nordic Genetic Resource Centre |                                        |
|                                                                 |        | H02148 (NGB90233)             | Uruguay   | South America        | Nordic Genetic Resource Centre |                                        |
|                                                                 |        | H06045 (NGB90342)             | Argentina | South America        | Nordic Genetic Resource Centre |                                        |
|                                                                 |        | JB225A                        | Argentina | South America        | Sabine Jakob, Frank Blattner   |                                        |
|                                                                 |        | JB228A_1                      | Argentina | South America        | Sabine Jakob, Frank Blattner   |                                        |
|                                                                 |        | JB228A_6                      | Argentina | South America        | Sabine Jakob, Frank Blattner   |                                        |
|                                                                 |        | H01132 (NGB07289)             | Argentina | South America        | Nordic Genetic Resource Centre | <i>H. euclaston</i> H01132             |
| <i>H. flexuosum</i> Steud.                                      |        | BCC2023 (H01133,<br>NGB06470) | Argentina | South America        | Nordic Genetic Resource Centre | <i>H. flexuosum</i> BCC2023            |
|                                                                 |        | CN27346                       | Argentina | South America        | AGR, Saskatoon, Canada         |                                        |

| Species                                                                | Ploidy | Accession number              | Country     | Species distribution         | Material source                                      | Topo6 type                            |
|------------------------------------------------------------------------|--------|-------------------------------|-------------|------------------------------|------------------------------------------------------|---------------------------------------|
|                                                                        |        | CN27358                       | Argentina   | South America                | AGR, Saskatoon, Canada                               |                                       |
|                                                                        |        | JB208A_2                      | Argentina   | South America                | Sabine Jakob, Frank Blattner                         |                                       |
|                                                                        |        | JB208A_3                      | Argentina   | South America                | Sabine Jakob, Frank Blattner                         |                                       |
|                                                                        |        | JB208A_1                      | Argentina   | South America                | Sabine Jakob, Frank Blattner                         | <i>H. flexuosum</i> JB208A_1          |
|                                                                        |        | CN27348                       | Argentina   | South America                | AGR, Saskatoon, Canada                               |                                       |
|                                                                        |        | CN27399                       | Argentina   | South America                | AGR, Saskatoon, Canada                               |                                       |
| <i>Hordeum fuegianum</i><br>Bothmer, Jacobsen &<br>Jørgensen           | 4x     | BCC2034 (H01371)              | Argentina   | South America                | Barley Core Collection                               | <i>H. fuegianum</i> BCC2034_A, B      |
|                                                                        |        | BCC2035 (H01422)              | Argentina   | South America                | Barley Core Collection                               | <i>H. fuegianum</i> BCC2035_A, B      |
|                                                                        |        | H02179 (NGB90017)             | Chile       | South America                | Nordic Genetic Resource Centre                       | <i>H. fuegianum</i> H02179_A, B       |
| <i>Hordeum guatemalense</i><br>Bothmer, Jacobsen &<br>Jørgensen        | 4x     | H02299 (NGB90554)             | Guatemala   | South America                | Nordic Genetic Resource Centre                       | <i>H. guatemalense</i> H02299_A, B    |
| <i>Hordeum intercedens</i><br>Nevski                                   | 2x     | BCC2044 (H01940, GRA979)      | USA         | North America                | Barley Core Collection                               | <i>H. intercedens</i> BCC2044         |
|                                                                        |        | BCC2059 (H03252)              | Mexico      | North America                | Barley Core Collection                               |                                       |
|                                                                        |        | CN28638                       | Mexico      | North America                | AGR, Saskatoon, Canada                               |                                       |
|                                                                        |        | CN28639                       | Mexico      | North America                | AGR, Saskatoon, Canada                               |                                       |
|                                                                        |        | CN28640                       | Mexico      | North America                | AGR, Saskatoon, Canada                               |                                       |
|                                                                        |        | CN28643                       | Mexico      | North America                | AGR, Saskatoon, Canada                               |                                       |
|                                                                        |        | CN28644                       | Mexico      | North America                | AGR, Saskatoon, Canada                               |                                       |
| <i>Hordeum jubatum</i> L.                                              | 4x     | BCC2048 (H02018)              | Mexico      | North America                | Barley Core Collection                               | <i>H. jubatum</i> BCC2048_A, B        |
|                                                                        |        | BCC2055 (H02324)              | USA         | North America                | Barley Core Collection                               | <i>H. jubatum</i> BCC2055_A, B        |
|                                                                        |        | JB064                         | Germany     | North America                | Sabine Jakob, Frank Blattner                         | <i>H. jubatum</i> JB064_A, B          |
|                                                                        |        | FB016                         | Argentina   | South America                | Frank Blattner                                       | <i>H. jubatum</i> FB016_A, B          |
| <i>Hordeum lechleri</i><br>(Steud.) Schenck                            | 6x     | BCC2027 (H01185)              | Argentina   | South America                | Barley Core Collection                               | <i>H. lechleri</i> BCC2027_B, C       |
|                                                                        |        | BCC2030 (H01310)              | Argentina   | South America                | Barley Core Collection                               | <i>H. lechleri</i> BCC2030_A, B, C    |
|                                                                        |        | JB044A_1                      | Argentina   | South America                | Sabine Jakob, Frank Blattner                         | <i>H. lechleri</i> JB044A1_A, B       |
|                                                                        |        | JB048A_4                      | Argentina   | South America                | Sabine Jakob, Frank Blattner                         | <i>H. lechleri</i> JB048A4_A, B, C    |
|                                                                        |        | JB045B_1a                     | Argentina   | South America                | Sabine Jakob, Frank Blattner                         | <i>H. lechleri</i> JB045B1a_A, B      |
|                                                                        |        | JB048A_6                      | Argentina   | South America                | Sabine Jakob, Frank Blattner                         | <i>H. lechleri</i> JB048A6_A, B       |
|                                                                        |        | JB048A_1                      | Argentina   | South America                | Sabine Jakob, Frank Blattner                         | <i>H. lechleri</i> JB048A1_A, B, C    |
| <i>Hordeum gussoneanum</i> Parl.                                       | 2x     | BCC2005 (H00539,<br>NGB7294)  | Spain       | Europe/SW Asia/Mediterranean | Barley Core Collection                               | <i>H. gussoneanum</i> 2x BCC2005      |
|                                                                        |        | JB106_6                       | France      | Europe/SW Asia/Mediterranean | Sabine Jakob, Frank Blattner                         | <i>H. gussoneanum</i> 2x JB106_6      |
|                                                                        |        | JB113_1                       | Italy       | Europe/SW Asia/Mediterranean | Sabine Jakob, Frank Blattner                         | <i>H. gussoneanum</i> 2x JB113_1      |
|                                                                        |        | JB157                         | USA         | Europe/SW Asia/Mediterranean | Sabine Jakob, Frank Blattner                         | <i>H. gussoneanum</i> 2x JB157        |
|                                                                        | 4x     | H00064 (NGB06507)             | Tajikistan  | Europe/SW Asia/Mediterranean | Nordic Genetic Resource Centre                       | <i>H. gussoneanum</i> 4x H00064_A, B  |
|                                                                        |        | H00818 (NGB90241)             | Iran        | Europe/SW Asia/Mediterranean | Nordic Genetic Resource Centre                       | <i>H. gussoneanum</i> 4x H00818_A, B  |
|                                                                        |        | BCC2011 (H00821,<br>NGB6521)  | Turkey      | Europe/SW Asia/Mediterranean | Barley Core Collection                               | <i>H. gussoneanum</i> 4x BCC2011_A, B |
|                                                                        |        | BCC2013 (H00824,<br>NGB6522)  | Iran        | Europe/SW Asia/Mediterranean | Barley Core Collection                               | <i>H. gussoneanum</i> 4x BCC2013_A, B |
|                                                                        |        | 01C0509096_2                  | Georgia     | Europe/SW Asia/Mediterranean | Res. Inst. Crop Production<br>Prague, Czech Republic | <i>H. gussoneanum</i> 4x 01C96_A, B   |
|                                                                        |        | H00081 (NGB06509)             | Afghanistan | Europe/SW Asia/Mediterranean | Nordic Genetic Resource Centre                       | <i>H. gussoneanum</i> 4x H00081_A, B  |
| <i>Hordeum marinum</i><br>Huds                                         | 2x     | BCC2006 (H00546,<br>NGB90345) | Spain       | Europe/SW Asia/Mediterranean | Barley Core Collection                               | <i>H. marinum</i> BCC2006             |
|                                                                        |        | BCC2001 (H00090,<br>NGB6821)  | Greece      | Europe/SW Asia/Mediterranean | Barley Core Collection                               | <i>H. marinum</i> BCC2001             |
|                                                                        |        | JB069_3                       | France      | Europe/SW Asia/Mediterranean | Sabine Jakob, Frank Blattner                         | <i>H. marinum</i> JB069_3             |
| <i>Hordeum murinum</i> L.<br>subsp. <i>glaucum</i><br>(Steud.) Tzvelev | 2x     | PI218078                      | Pakistan    | Europe/SW Asia/Mediterranean | GRIN USDA Aberdeen, USA                              | <i>H. murinum</i> 2x PI218078_A, B, C |
|                                                                        |        | BCC2002 (H00219)              | Tunisia     | Europe/SW Asia/Mediterranean | Barley Core Collection                               | <i>H. murinum</i> 2x BCC2002_A, B, C  |
|                                                                        |        | PI223371 (CN064124)           | Iran        | Europe/SW Asia/Mediterranean | GRIN USDA Aberdeen, USA                              | <i>H. murinum</i> 2x PI223371_A, B    |
| <i>Hordeum murinum</i> L.<br>subsp. <i>murinum</i>                     | 4x     | JB097                         | Germany     | Europe/SW Asia/Mediterranean | Sabine Jakob, Frank Blattner                         | <i>H. murinum</i> 4x JB097_A, B       |
|                                                                        |        | BCC2009 (H00721)              | Denmark     | Europe/SW Asia/Mediterranean | Barley Core Collection                               | <i>H. murinum</i> 4x BCC2009_A, B, C  |
|                                                                        |        | H00217 (NGB06870)             | Germany     | Europe/SW Asia/Mediterranean | Nordic Genetic Resource Centre                       | <i>H. murinum</i> 4x H00217_A, B, C   |
| <i>Hordeum murinum</i> L.<br>subsp. <i>leporinum</i><br>(Link) Arcang. | 4x     | BCC2007 (H00561)              | Spain       | Europe/SW Asia/Mediterranean | Barley Core Collection                               | <i>H. murinum</i> 4x BCC2007          |
|                                                                        |        | BCC2008 (H00591)              | Greece      | Europe/SW Asia/Mediterranean | Barley Core Collection                               | <i>H. murinum</i> 4x BCC2008          |
|                                                                        |        | PI244767                      | Iran        | Europe/SW Asia/Mediterranean | GRIN USDA Aberdeen, USA                              | <i>H. murinum</i> 4x PI244767         |
|                                                                        |        | GRA1097                       | Bulgaria    | Europe/SW Asia/Mediterranean | Gene bank IPK                                        | <i>H. murinum</i> 4x GRA1097          |
|                                                                        | 6x     | F2107                         | Uzbekistan  | Europe/SW Asia/Mediterranean | Reinhard Fritsch                                     | <i>H. murinum</i> 6x F2107            |

| Species                                    | Ploidy | Accession number         | Country     | Species distribution         | Material source                | Topo6 type                          |
|--------------------------------------------|--------|--------------------------|-------------|------------------------------|--------------------------------|-------------------------------------|
|                                            |        | H00812 (NGB06878)        | Turkey      | Europe/SW Asia/Mediterranean | Nordic Genetic Resource Centre | <i>H. murinum</i> 6x H00812_A, B, C |
|                                            |        | PI211046                 | Afghanistan | Europe/SW Asia/Mediterranean | GRIN USDA Aberdeen, USA        | <i>H. murinum</i> 6x PI211046_A, B  |
| <i>Hordeum muticum</i> J. Presl            | 2x     | BCC2014 (H00958)         | Bolivia     | South America                | Barley Core Collection         | <i>H. muticum</i> BCC2014           |
|                                            |        | H01837 (NGB07303)        | Argentina   | South America                | Nordic Genetic Resource Centre |                                     |
|                                            |        | H06457a (NGB90357)       | Argentina   | South America                | Nordic Genetic Resource Centre |                                     |
|                                            |        | H06459 (NGB90358)        | Argentina   | South America                | Nordic Genetic Resource Centre |                                     |
|                                            |        | H06468 (NGB90359)        | Argentina   | South America                | Nordic Genetic Resource Centre |                                     |
|                                            |        | H06470 (NGB90360)        | Argentina   | South America                | Nordic Genetic Resource Centre |                                     |
|                                            |        | BCC2042 (H01784, GRA982) | Argentina   | South America                | Barley Core Collection         | <i>H. muticum</i> BCC2042           |
|                                            |        | H06446 (NGB90060)        | Argentina   | South America                | Nordic Genetic Resource Centre |                                     |
|                                            |        | H00955 (NGB15689)        | Bolivia     | South America                | Nordic Genetic Resource Centre | <i>H. muticum</i> H00955            |
|                                            |        | H00957 (NGB08566)        | Bolivia     | South America                | Nordic Genetic Resource Centre | <i>H. muticum</i> H00957            |
| <i>Hordeum parodii</i> Covas               | 6x     | BCC2025 (H01146)         | Argentina   | South America                | Barley Core Collection         | <i>H. parodii</i> BCC2025_A, B, C   |
|                                            |        | BCC2066 (H06328)         | Argentina   | South America                | Barley Core Collection         | <i>H. parodii</i> BCC2066_A, B, C   |
|                                            |        | JB004_1                  | Argentina   | South America                | Sabine Jakob, Frank Blattner   | <i>H. parodii</i> JB004_1_A, B      |
|                                            |        | JB019A_2                 | Argentina   | South America                | Sabine Jakob, Frank Blattner   | <i>H. parodii</i> JB019A2_A, B, C   |
| <i>Hordeum patagonicum</i> (Haumann) Covas | 2x     | JB044Bd                  | Argentina   | South America                | Sabine Jakob, Frank Blattner   | <i>H. patagonicum</i> JB044Bd       |
|                                            |        | JB319A_1                 | Argentina   | South America                | Sabine Jakob, Frank Blattner   |                                     |
|                                            |        | JB024_1                  | Argentina   | South America                | Sabine Jakob, Frank Blattner   | <i>H. patagonicum</i> JB024_1       |
|                                            |        | JB306C_1                 | Argentina   | South America                | Sabine Jakob, Frank Blattner   |                                     |
|                                            |        | BCC2064 (H06051)         | Argentina   | South America                | Barley Core Collection         | <i>H. patagonicum</i> BCC2064       |
|                                            |        | JB287C_3                 | Argentina   | South America                | Sabine Jakob, Frank Blattner   |                                     |
|                                            |        | JB303B_1                 | Argentina   | South America                | Sabine Jakob, Frank Blattner   | <i>H. patagonicum</i> JB303B_1      |
|                                            |        | JB303B_4                 | Argentina   | South America                | Sabine Jakob, Frank Blattner   |                                     |
|                                            |        | H01248                   | Argentina   | South America                | Nordic Genetic Resource Centre | <i>H. patagonicum</i> H01248        |
|                                            |        | H01535                   | Argentina   | South America                | Nordic Genetic Resource Centre | <i>H. patagonicum</i> H01535        |
|                                            |        | JB015C_1                 | Argentina   | South America                | Sabine Jakob, Frank Blattner   | <i>H. patagonicum</i> JB015C_1      |
|                                            |        | JB318A_4                 | Argentina   | South America                | Sabine Jakob, Frank Blattner   | <i>H. patagonicum</i> JB138A_4      |
|                                            |        | JB052Ba                  | Argentina   | South America                | Sabine Jakob, Frank Blattner   | <i>H. patagonicum</i> JB052Ba       |
|                                            |        | BCC2033 (H01358)         | Argentina   | South America                | Barley Core Collection         | <i>H. patagonicum</i> BCC2033       |
| <i>Hordeum procerum</i> Nevski             | 6x     | BCC2024 (H01136)         | Argentina   | South America                | Barley Core Collection         | <i>H. procerum</i> BCC2024_A, B, C  |
|                                            |        | BCC2040 (H01781)         | Argentina   | South America                | Barley Core Collection         | <i>H. procerum</i> BCC2040_A, B, C  |
|                                            |        | JB221A_2                 | Argentina   | South America                | Sabine Jakob, Frank Blattner   | <i>H. procerum</i> JB221A2_A, B, C  |
|                                            |        | JB223A_3                 | Argentina   | South America                | Sabine Jakob, Frank Blattner   | <i>H. procerum</i> JB223A3_A, B, C  |
| <i>Hordeum pubiflorum</i> Hook.            | 2x     | H01238 (NGB08538)        | Argentina   | South America                | Nordic Genetic Resource Centre | <i>H. pubiflorum</i> H01238         |
|                                            |        | JB027B_5                 | Argentina   | South America                | Sabine Jakob, Frank Blattner   |                                     |
|                                            |        | JB059B_2a                | Argentina   | South America                | Sabine Jakob, Frank Blattner   |                                     |
|                                            |        | JB460B_3                 | Argentina   | South America                | Sabine Jakob, Frank Blattner   |                                     |
|                                            |        | JB463B_2                 | Argentina   | South America                | Sabine Jakob, Frank Blattner   |                                     |
|                                            |        | JB463B_4                 | Argentina   | South America                | Sabine Jakob, Frank Blattner   |                                     |
|                                            |        | JB020_2                  | Argentina   | South America                | Sabine Jakob, Frank Blattner   | <i>H. pubiflorum</i> JB020_2        |
|                                            |        | JB033Ba                  | Argentina   | South America                | Sabine Jakob, Frank Blattner   |                                     |
|                                            |        | JB323_4                  | Argentina   | South America                | Sabine Jakob, Frank Blattner   |                                     |
|                                            |        | JB447A_1                 | Argentina   | South America                | Sabine Jakob, Frank Blattner   |                                     |
|                                            |        | JB035C_1                 | Argentina   | South America                | Sabine Jakob, Frank Blattner   | <i>H. pubiflorum</i> JB035C_1       |
|                                            |        | JB312A_1                 | Argentina   | South America                | Sabine Jakob, Frank Blattner   |                                     |
|                                            |        | JB053Ba                  | Argentina   | South America                | Sabine Jakob, Frank Blattner   | <i>H. pubiflorum</i> JB053Ba        |
|                                            |        | JB053Bd                  | Argentina   | South America                | Sabine Jakob, Frank Blattner   |                                     |
|                                            |        | BCC2068 (H06687)         | Bolivia     | South America                | Barley Core Collection         | <i>H. pubiflorum</i> BCC2068        |
|                                            |        | JB021_5                  | Argentina   | South America                | Sabine Jakob, Frank Blattner   | <i>H. pubiflorum</i> JB021_5        |
|                                            |        | JB291_2                  | Argentina   | South America                | Sabine Jakob, Frank Blattner   | <i>H. pubiflorum</i> JB291_2        |
| <i>Hordeum pusillum</i> Nutt.              | 2x     | CN27877                  | USA         | North America                | AGR, Saskatoon, Canada         | <i>H. pusillum</i> CN27877          |
|                                            |        | Clho15663                | USA         | North America                | GRIN USDA Aberdeen, USA        |                                     |
|                                            |        | CN27888                  | USA         | North America                | AGR, Saskatoon, Canada         |                                     |
|                                            |        | CN28655                  | USA         | North America                | AGR, Saskatoon, Canada         |                                     |
|                                            |        | CN32799                  | USA         | North America                | AGR, Saskatoon, Canada         |                                     |

| Species                                            | Ploidy | Accession number          | Country    | Species distribution         | Material source                | Top6 type                                             |
|----------------------------------------------------|--------|---------------------------|------------|------------------------------|--------------------------------|-------------------------------------------------------|
|                                                    |        | CN32803                   | USA        | North America                | AGR, Saskatoon, Canada         |                                                       |
|                                                    |        | CN028654                  | USA        | North America                | AGR, Saskatoon, Canada         |                                                       |
|                                                    |        | BCC2043 (H01906, GRA1176) | USA        | North America                | Barley Core Collection         | <i>H. pusillum</i> BCC2043                            |
|                                                    |        | CN27810                   | USA        | North America                | AGR, Saskatoon, Canada         |                                                       |
|                                                    |        | CN27814                   | USA        | North America                | AGR, Saskatoon, Canada         |                                                       |
|                                                    |        | CN27885                   | USA        | North America                | AGR, Saskatoon, Canada         |                                                       |
|                                                    |        | CN27886                   | USA        | North America                | AGR, Saskatoon, Canada         |                                                       |
|                                                    |        | BCC2049 (H02038)          | USA        | North America                | Barley Core Collection         | <i>H. pusillum</i> BCC2049                            |
| <i>Hordeum roshevitzii</i> Bowden                  | 2x     | BCC2069 (H07202)          | China      | Central Asia                 | Barley Core Collection         | <i>H. roshevitzii</i> BCC2069                         |
|                                                    |        | H07039 (NGB06891)         | China      | Central Asia                 | Nordic Genetic Resource Centre |                                                       |
|                                                    |        | H07046 (NGB06892)         | China      | Central Asia                 | Nordic Genetic Resource Centre |                                                       |
|                                                    |        | H07437 (NGB08587)         | China      | Central Asia                 | Nordic Genetic Resource Centre |                                                       |
|                                                    |        | H07754 (NGB90149)         | China      | Central Asia                 | Nordic Genetic Resource Centre |                                                       |
|                                                    |        | H08787 (NGB90068)         | China      | Central Asia                 | Nordic Genetic Resource Centre |                                                       |
|                                                    |        | H09152 (NGB90388)         | China      | Central Asia                 | Nordic Genetic Resource Centre |                                                       |
|                                                    |        | H09154 (NGB90389)         | China      | Central Asia                 | Nordic Genetic Resource Centre |                                                       |
|                                                    |        | H09157 (NGB90390)         | China      | Central Asia                 | Nordic Genetic Resource Centre |                                                       |
|                                                    |        | M4341                     | Mongolia   | Central Asia                 | Karsten Wesche                 |                                                       |
|                                                    |        | M4352                     | Mongolia   | Central Asia                 | Karsten Wesche                 |                                                       |
|                                                    |        | H07421a (NGB90386)        | China      | Central Asia                 | Nordic Genetic Resource Centre | <i>H. roshevitzii</i> H07421a                         |
|                                                    |        | H07879 (NGB90387)         | China      | Central Asia                 | Nordic Genetic Resource Centre |                                                       |
|                                                    |        | H10070 (NGB90391)         | Russia     | Central Asia                 | Nordic Genetic Resource Centre |                                                       |
|                                                    |        | H07883 (NGB90150)         | China      | Central Asia                 | Nordic Genetic Resource Centre |                                                       |
|                                                    |        | H09194 (NGB90621)         | China      | Central Asia                 | Nordic Genetic Resource Centre | <i>H. roshevitzii</i> H09194                          |
|                                                    |        | BCC2015 (H10070)          | Russia     | Central Asia                 | Barley Core Collection         | <i>H. roshevitzii</i> BCC2015                         |
| <i>Hordeum secalinum</i> Schreb.                   | 4x     | BCC2004 (H00296)          | Spain      | Europe/SW Asia/Mediterranean | Barley Core Collection         | <i>H. secalinum</i> BCC2004_A                         |
|                                                    |        | GRA1016                   | France     | Europe/SW Asia/Mediterranean | Gene bank IPK                  | <i>H. secalinum</i> GRA1016_A, B                      |
|                                                    |        | JB104_1                   | Germany    | Europe/SW Asia/Mediterranean | Sabine Jakob, Frank Blattner   | <i>H. secalinum</i> JB104_1_A, B                      |
|                                                    |        | JB105_4                   | Germany    | Europe/SW Asia/Mediterranean | Sabine Jakob, Frank Blattner   | <i>H. secalinum</i> JB105_4_A, B                      |
| <i>Hordeum stenostachys</i> Godr.                  | 2x     | H01780 (NGB90151)         | Argentina  | South America                | Nordic Genetic Resource Centre | <i>H. stenostachys</i> H01780                         |
|                                                    |        | H06431 (NGB90070)         | Argentina  | South America                | Nordic Genetic Resource Centre |                                                       |
|                                                    |        | H06484 (NGB90072)         | Argentina  | South America                | Nordic Genetic Resource Centre |                                                       |
|                                                    |        | JB216_2                   | Argentina  | South America                | Sabine Jakob, Frank Blattner   |                                                       |
|                                                    |        | JB217B_2                  | Argentina  | South America                | Sabine Jakob, Frank Blattner   |                                                       |
|                                                    |        | JB218_5                   | Argentina  | South America                | Sabine Jakob, Frank Blattner   |                                                       |
|                                                    |        | JB219B_2                  | Argentina  | South America                | Sabine Jakob, Frank Blattner   |                                                       |
|                                                    |        | JB241_1                   | Argentina  | South America                | Sabine Jakob, Frank Blattner   |                                                       |
|                                                    |        | JB254_1                   | Argentina  | South America                | Sabine Jakob, Frank Blattner   |                                                       |
|                                                    |        | JB254_5                   | Argentina  | South America                | Sabine Jakob, Frank Blattner   |                                                       |
|                                                    |        | JB258_1                   | Argentina  | South America                | Sabine Jakob, Frank Blattner   |                                                       |
|                                                    |        | JB258_2                   | Argentina  | South America                | Sabine Jakob, Frank Blattner   |                                                       |
|                                                    |        | JB267_1                   | Argentina  | South America                | Sabine Jakob, Frank Blattner   |                                                       |
|                                                    |        | BCC2021 (H01108)          | Argentina  | South America                | Barley Core Collection         | <i>H. stenostachys</i> BCC2021                        |
|                                                    |        | CN27345                   | Argentina  | South America                | AGR, Saskatoon, Canada         |                                                       |
|                                                    |        | JB199A_1                  | Argentina  | South America                | Sabine Jakob, Frank Blattner   |                                                       |
|                                                    |        | JB211_2                   | Argentina  | South America                | Sabine Jakob, Frank Blattner   |                                                       |
|                                                    |        | JB213_5                   | Argentina  | South America                | Sabine Jakob, Frank Blattner   |                                                       |
|                                                    |        | JB214_4                   | Argentina  | South America                | Sabine Jakob, Frank Blattner   | <i>H. stenostachys</i> JB214_4                        |
| <i>Hordeum tetraploidum</i> Covas                  | 4x     | JB048C_2b                 | Argentina  | South America                | Sabine Jakob, Frank Blattner   | <i>H. tetraploidum</i> JB048C_2b_A, B                 |
|                                                    |        | JB010_4                   | Argentina  | South America                | Sabine Jakob, Frank Blattner   | <i>H. tetraploidum</i> JB010_4_A, B, C                |
|                                                    |        | JB026a                    | Argentina  | South America                | Sabine Jakob, Frank Blattner   | <i>H. tetraploidum</i> JB026a_A, B                    |
|                                                    |        | JB029B_4                  | Argentina  | South America                | Sabine Jakob, Frank Blattner   | <i>H. tetraploidum</i> JB029B_4_A, B                  |
| <i>Hordeum vulgare</i> L. subsp. <i>spontaneum</i> | 2x     | F2097                     | Uzbekistan | Europe/SW Asia/Mediterranean | Reinhard Fritsch               | <i>H. vulgare</i> subsp. <i>spontaneum</i> F2097      |
|                                                    |        | F2131                     | Uzbekistan | Europe/SW Asia/Mediterranean | Reinhard Fritsch               | <i>H. vulgare</i> subsp. <i>spontaneum</i> F2131_A, B |
| <i>Dasyphyrum villosum</i> (L.) P. Candargy        | 2x     | GRA1020                   | Italy      | Europe/SW Asia/Mediterranean | Gene bank IPK                  | <i>Dasyphyrum villosum</i> GRA1020                    |
| <i>Eremopyrum triticeum</i> (Gaertn.) Nevski       | 2x     | GRA2250                   | Kazakhstan | Central Asia                 | Gene bank IPK                  | <i>Eremopyrum triticeum</i> GRA2250                   |

| Species                                                                                 | Ploidy | Accession number    | Country    | Species distribution         | Material source | Topo6 type                                |
|-----------------------------------------------------------------------------------------|--------|---------------------|------------|------------------------------|-----------------|-------------------------------------------|
| <i>Psathyrostachys juncea</i> (Fisch.) Nevski                                           | 2x     | GRA 692             | Mongolia   | Central Asia                 | Gene bank IPK   | <i>Psathyrostachys juncea</i> GRA0692     |
| <i>Secale strictum</i> (C.Presl) C.Presl subsp. <i>kuprijanovii</i> (Grossh.) K. Hammer | 2x     | R 1108              | Kazakhstan | Central Asia                 | Gene bank IPK   | <i>Secale strictum</i> R1108              |
| <i>Secale vavilovii</i> Grossh.                                                         | 2x     | R1027               | Italy      | Europe/SW Asia/Mediterranean | Gene bank IPK   | <i>Secale vavilovii</i> R1027             |
| <i>Taeniatherum caput-medusae</i> (L.) Nevski                                           | 2x     | GRA1126             | Tajikistan | Central Asia                 | Gene bank IPK   | <i>Taeniatherum caput-medusae</i> GRA1126 |
| <i>Triticum monococcum</i> L. var. <i>vulgare</i> Körn.                                 | 2x     | TR113061            | Turkey     | Europe/SW Asia/Mediterranean | Gene bank IPK   | <i>Triticum monococcum</i> TR113061       |
| <i>Triticum urartu</i> Tumanian ex Gandilyan var. <i>spontaneoalbum</i> Tumanian        | 2x     | TR117921 (PI427516) | Turkey     | Europe/SW Asia/Mediterranean | USDA            | <i>Triticum urartu</i> TR117921           |
